# Supplementary material for: Elevated Circulatory Proline to Glutamine Ratio (PQR) in Endometriosis and Its Potential as a Diagnostic Biomarker
Source: PubMed Central journal article supplement — ACS Omega. 2022 Apr 19;7(17):14856–66. doi: 10.1021/acsomega.2c00332 (PMC9088897; doi:10.1021/acsomega.2c00332), 2022-04-19

## Elevated circulatory proline-to-glutamine ratio (PQR) in endometriosis and its potential as a diagnostic biomarker

Kusum kusum<sup>1</sup>, Ritu Raj<sup>2</sup>, Sangeeta Rai<sup>3</sup>, Pranjali Pranjali<sup>2</sup>, Ashish Ashish<sup>4</sup>, Sara Vicente-Muñoz<sup>5</sup>, Radha Chaube<sup>1\*</sup>, and Dinesh Kumar<sup>2\*</sup>

<sup>1</sup>Department of Zoology, Institute of Science, Banaras Hindu University, Varanasi-221005, U.P. | India

<sup>2</sup>Centre of Biomedical Research (CBMR), SGPGIMS Campus, Lucknow-226014, U.P. | India

<sup>3</sup>Department of Obstetrics and Gynecology, Institute of Medical Sciences, Banaras Hindu University, Varanasi-221005, U.P. | India

<sup>4</sup>Department of Anatomy, Institute of Medical Sciences, Banaras Hindu University, Varanasi-221005, U.P. | India

<sup>5</sup>NMR-Metabolomics Core, Division of Pathology, Cincinnati Children's Hospital Medical Center, Cincinnati, OH 45229

### \*Authors for Correspondence:

|                                                                                                                                                                                                                                                                |                                                                                                                                                                                                                           |
|----------------------------------------------------------------------------------------------------------------------------------------------------------------------------------------------------------------------------------------------------------------|---------------------------------------------------------------------------------------------------------------------------------------------------------------------------------------------------------------------------|
| Dr. RadhaChaube<br>(Professor)<br>Department of Zoology, Institute of Science,<br>Banaras Hindu University, Varanasi-221005,<br>U.P.   India<br>Email: <a href="mailto:chauberadha@rediffmail.com">chauberadha@rediffmail.com</a><br>ORCID: 000-0002-6029-531X | Dr. Dinesh Kumar<br>(Associate Professor)<br>Centre of Biomedical Research (CBMR),<br>Lucknow-226014, U.P.   India<br>Email: <a href="mailto:dineshcbmr@gmail.com">dineshcbmr@gmail.com</a><br>ORCID: 0000-0001-8079-6739 |
|----------------------------------------------------------------------------------------------------------------------------------------------------------------------------------------------------------------------------------------------------------------|---------------------------------------------------------------------------------------------------------------------------------------------------------------------------------------------------------------------------|

**Keywords:** <sup>1</sup>H NMR spectroscopy; Serum metabolomics; Endometriosis; Tumor Biology; Proline to glutamine ratio; Metabolic Biomarker;

## Supplementary Information

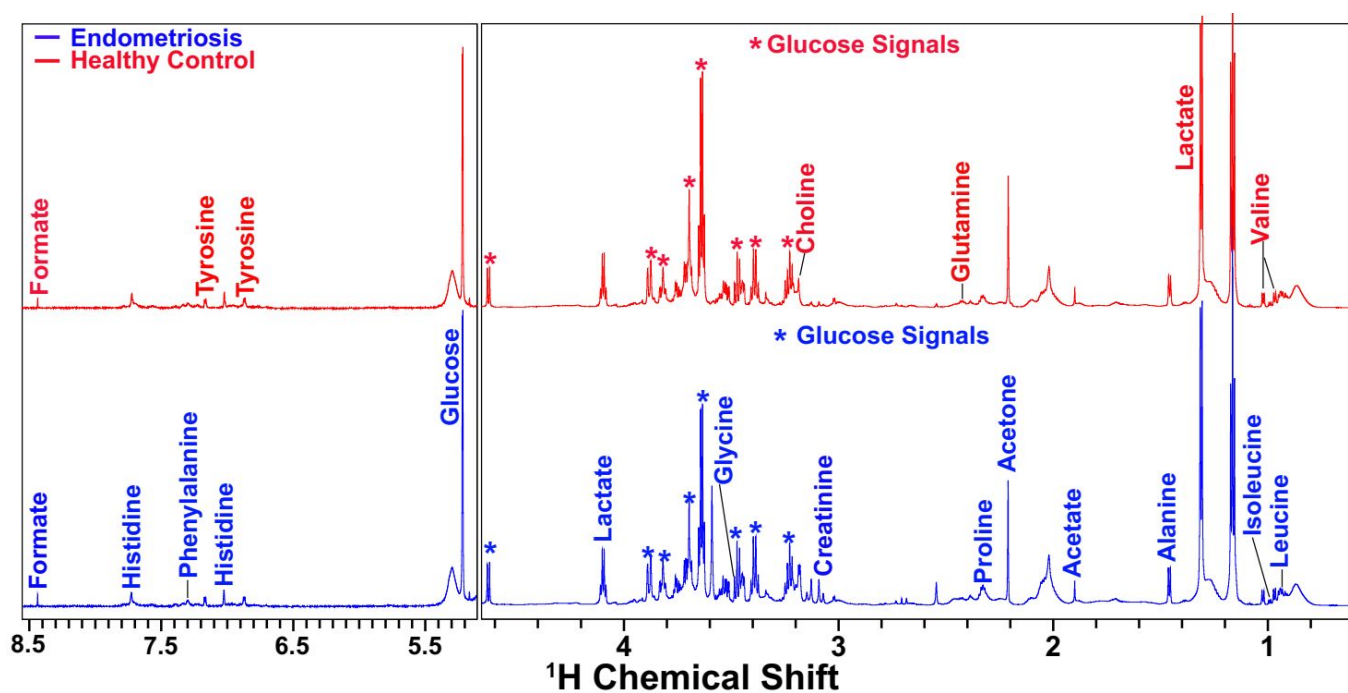

Figure S1: The cumulative 1D  $^1\text{H}$  CPMG NMR spectra of serum samples of endometriosis (EM, in blue) and normal control (NC, in Red) study groups showing the metabolite specific assignment of NMR peaks.

## Supplementary Information

**Figure S2:** Box plots showing comparison of circulatory levels of formate (A), glutamine (B) and proline (C) between NC and EM subjects. These concentration levels have been estimated with respect to trimethyl peak of TSP (trimethylsilylpropionic acid-d4) at 0.00 ppm calibrated at 100  $\mu$ M in the commercial software CHENOMX. (D) The table showing estimated serum levels of metabolites in mean  $\pm$  SEM (i.e. standard error in mean).

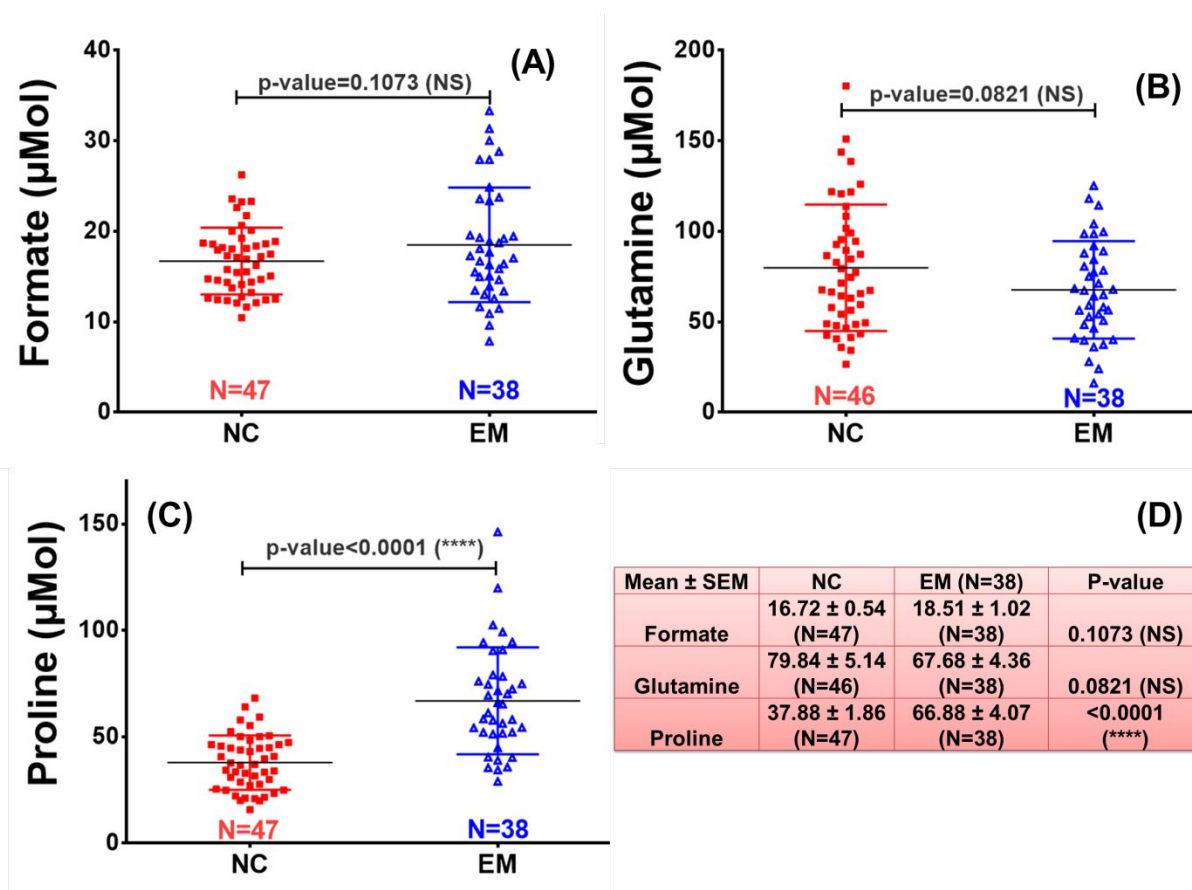

## Supplementary Information

**Figure S3:** The stacking (A) and overlay (B) of cumulative 1D  $^1\text{H}$  CPMG NMR spectra of serum samples of endometriosis (EM, in red) and normal control (NC, in blue) showing the labelling of peaks of formate and TSP. Spectral region of trimethyl peak of TSP (trimethylsilylpropionic acid-d<sub>4</sub>) at 0.00 ppm (C) and that of formate signal (D) zoomed for visual comparison between NC and EM subjects.

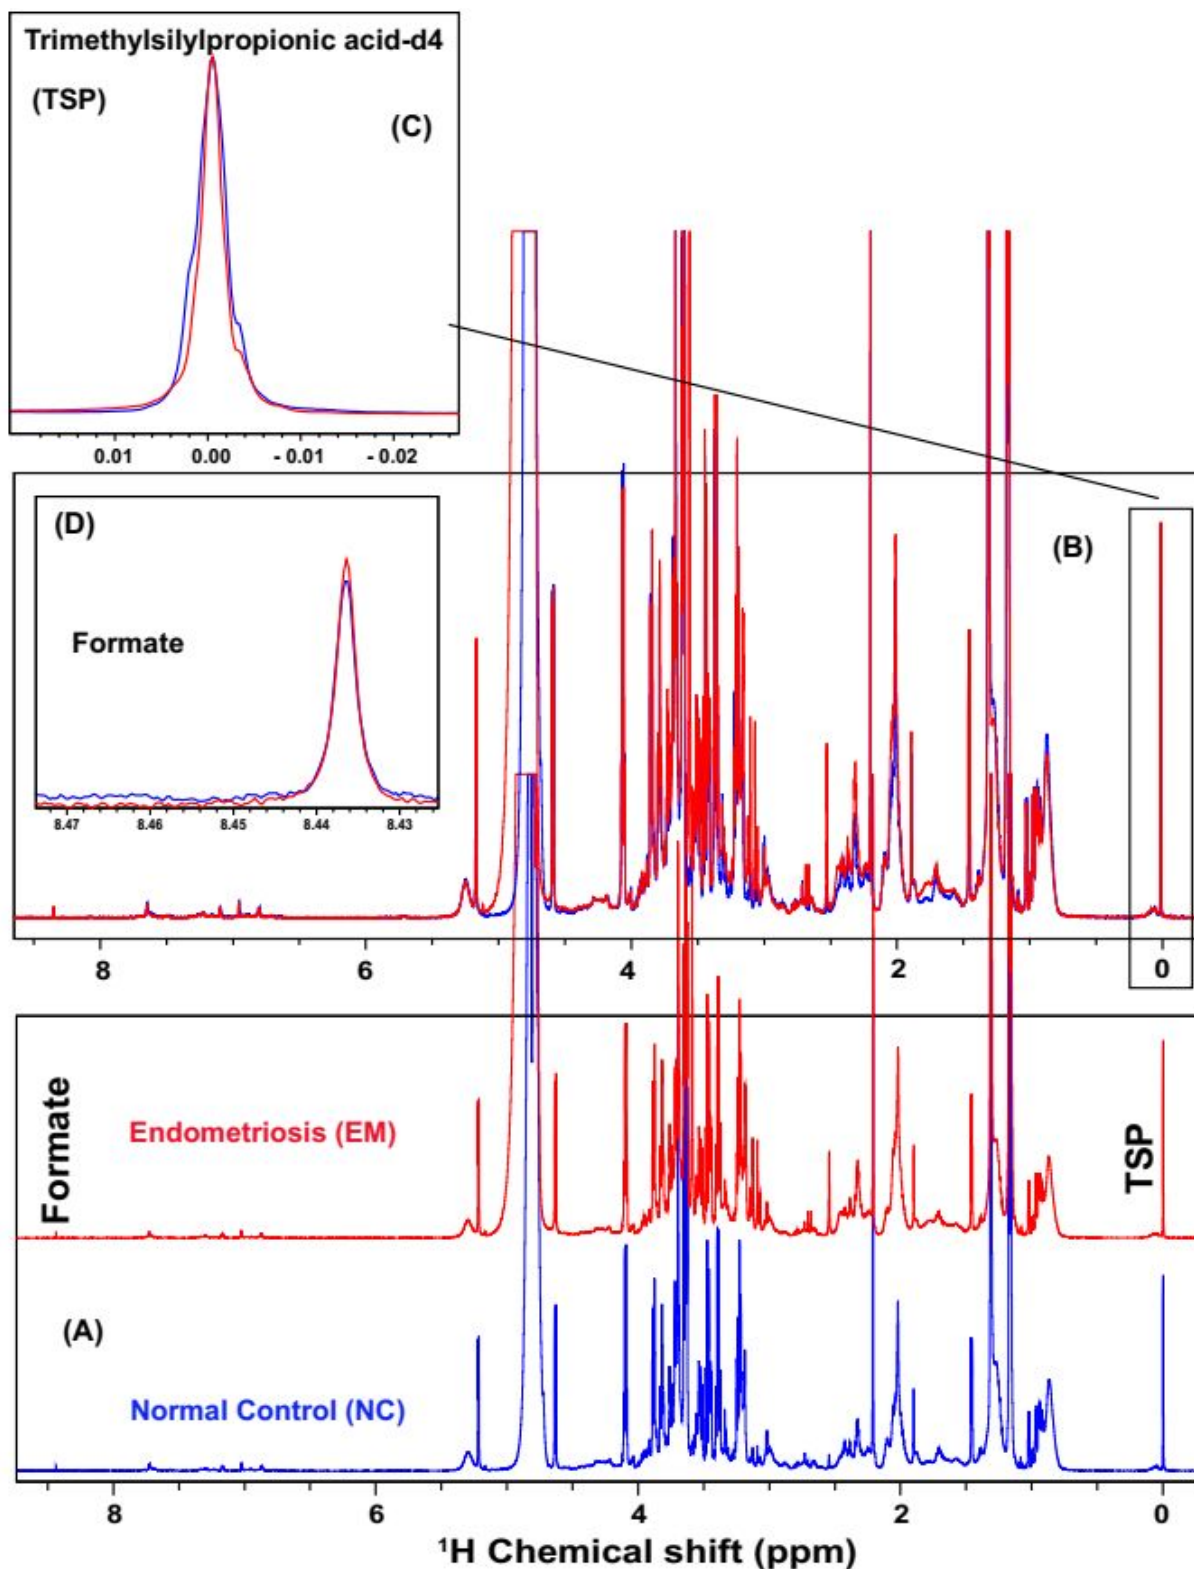

Supplement: ao2c00332_si_001.pdf [file ao2c00332_si_001.pdf]
